# Supplementary material for: Long-term safety of pirfenidone: results of the prospective, observational PASSPORT study
Source: PubMed Central journal article supplement — ERJ Open Res. 2018 Oct 19;4(4):00084-2018. doi: 10.1183/23120541.00084-2018 (PMC6194203; doi:10.1183/23120541.00084-2018), 2018-10-19
Supplement: 00084-2018_supp.pdf [file 00084-2018_supp.pdf]

**Supplementary materials**

**SUPPLEMENTARY FIGURE S1** Kaplan Meier of survival in the overall population<sup>#</sup>

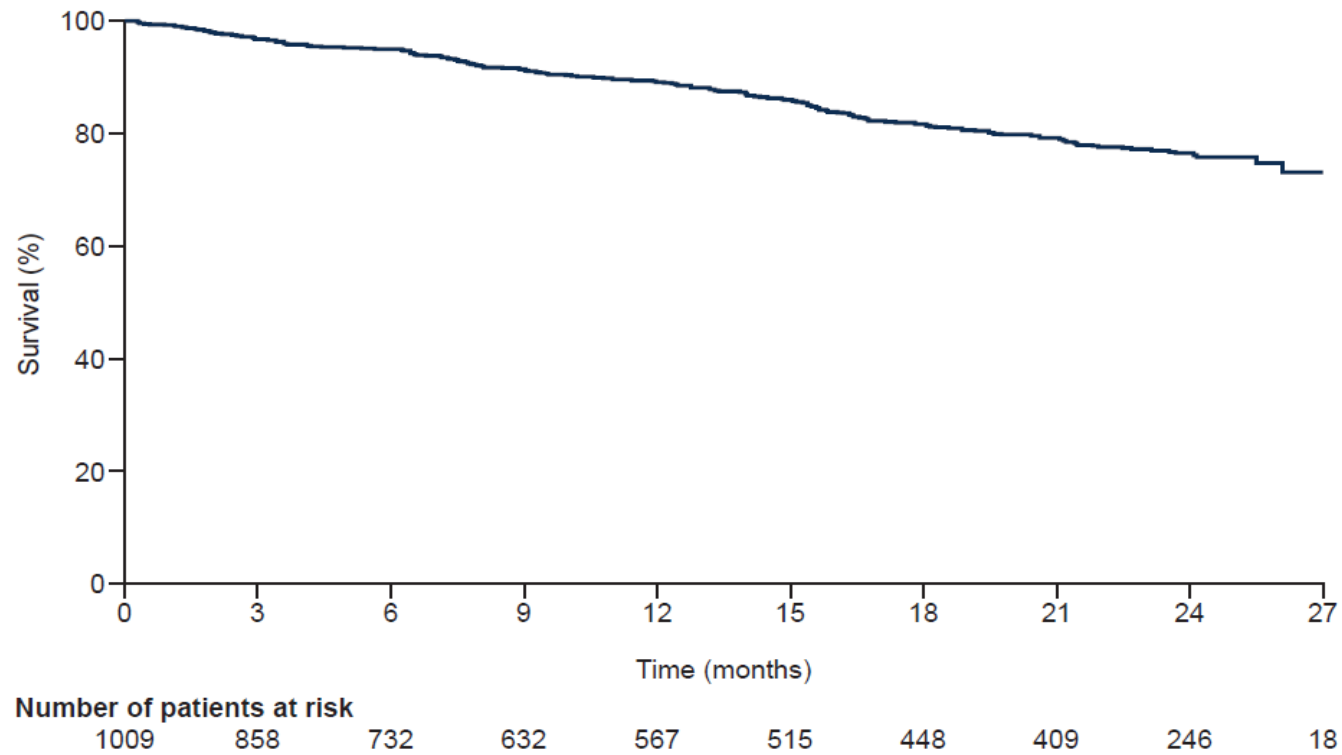

<sup>#</sup>: Only deaths that were an outcome of an ADR or were the primary reason for study discontinuation were collected.

**SUPPLEMENTARY TABLE S1** Early discontinuation of pirfenidone in the overall population by country

|                                                           | <b>France (n=214)</b> | <b>Germany (n=452)</b> | <b>UK (n=184)</b>  | <b>Other (n=159)</b> |
|-----------------------------------------------------------|-----------------------|------------------------|--------------------|----------------------|
| <b>Number of patients who discontinued, n (%)</b>         | 148 (69.2)            | 289 (63.9)             | 146 (79.3)         | 72 (45.3)            |
| Death                                                     | 21/148 (14.2)         | 78/289 (27.0)          | 34/146 (23.3)      | 27/72 (37.5)         |
| ADR <sup>#</sup>                                          | 76/148 (51.4)         | 108/289 (37.4)         | 69/146 (47.3)      | 29/72 (40.3)         |
| Other                                                     | 51/148 (34.5)         | 103/289 (35.6)         | 43/146 (29.5)      | 16/72 (22.2)         |
| <b>Overall median (IQR) time to discontinuation, days</b> | 249.0 (90.0–461.0)    | 176.0 (60.0–401.0)     | 201.5 (88.0–398.0) | 210.5 (70.0–435.0)   |

ADR: adverse drug reaction; IQR: interquartile range. <sup>#</sup>: An ADR was defined as any safety event with a possible causal relationship to pirfenidone. The treating physician (investigator) made a clinical judgement to decide if the ADR was related to pirfenidone.

**SUPPLEMENTARY TABLE S2** ADRs<sup>#</sup> in the overall population by country

|                                   | France (n=214) | Germany (n=452) | UK (n=184) | Other (n=159) | Total (N=1009) |
|-----------------------------------|----------------|-----------------|------------|---------------|----------------|
| <b>Any ADR<sup>‡</sup>, n (%)</b> | 176 (82.2)     | 314 (69.5)      | 139 (75.5) | 112 (70.4)    | 741 (73.4)     |
| Nausea                            | 34 (15.9)      | 97 (21.5)       | 38 (20.7)  | 39 (24.5)     | 208 (20.6)     |
| Fatigue                           | 33 (15.4)      | 83 (18.4)       | 41 (22.3)  | 30 (18.9)     | 187 (18.5)     |
| Decreased appetite                | 44 (20.6)      | 62 (13.7)       | 39 (21.2)  | 18 (11.3)     | 163 (16.2)     |
| Decreased weight                  | 62 (29.0)      | 50 (11.1)       | 35 (19.0)  | 14 (8.8)      | 161 (16.0)     |
| Rash                              | 26 (12.1)      | 52 (11.5)       | 28 (15.2)  | 17 (10.7)     | 123 (12.2)     |
| Diarrhoea                         | 26 (12.1)      | 29 (6.4)        | 30 (16.3)  | 11 (6.9)      | 96 (9.5)       |
| Dizziness                         | 15 (7.0)       | 29 (6.4)        | 9 (4.9)    | 12 (7.5)      | 65 (6.4)       |
| Photosensitivity reaction         | 23 (10.7)      | 19 (4.2)        | 8 (4.3)    | 9 (5.7)       | 59 (5.8)       |

ADR: adverse drug reaction. <sup>#</sup>: An ADR was defined as any safety event with a possible causal relationship to pirfenidone. The treating physician (investigator) made a clinical judgement to decide if the ADR was related to pirfenidone. <sup>‡</sup>: Most common ADRs ( $\geq 5\%$  of total number of patients).

**SUPPLEMENTARY TABLE S3** Dose adjustments in the overall population

|                                                                   | <b>Patients, n (%)</b> |
|-------------------------------------------------------------------|------------------------|
| <b>Patients that had at least one dose adjustment<sup>#</sup></b> | 373 (37.0)             |
| Dose reduction <sup>¶</sup>                                       | 259 (25.7)             |
| Temporary <sup>†</sup>                                            | 132 (13.1)             |
| Permanent <sup>†</sup>                                            | 160 (15.9)             |
| Dose interruption <sup>§</sup>                                    | 163 (16.2)             |

<sup>#</sup>: A dose adjustment was considered to be at least one dose reduction and/or dose interruption in the treatment course of a patient. <sup>¶</sup>: A dose reduction was considered to be at least one temporary and/or permanent reduction in dose during the treatment course of a patient. <sup>†</sup>: A patient may have had a temporary dose reduction initially, and a subsequent permanent reduction. A dose reduction was considered temporary if the dose changed further, whereas it was considered permanent if the patient ended the study at the reduced dose. <sup>§</sup>: A dose interruption occurred when treatment was temporarily discontinued for  $\geq 1$  day and subsequently restarted.

**SUPPLEMENTARY TABLE S4** ADRs<sup>#</sup> with a fatal outcome in the overall population

| <b>ADR</b>                                       | <b>Patients, n (%)</b> |
|--------------------------------------------------|------------------------|
| <b>Patients with an ADR with a fatal outcome</b> | 6 (0.6)                |
| Cardiac arrest                                   | 1 (0.1)                |
| Cardiac failure                                  | 1 (0.1)                |
| Acute respiratory distress syndrome              | 1 (0.1)                |
| Pulmonary embolism                               | 1 (0.1)                |
| Pneumonia                                        | 1 (0.1)                |
| Decreased weight                                 | 1 (0.1)                |

ADR: adverse drug reaction. <sup>#</sup>: An ADR was defined as any safety event with a possible causal relationship to pirfenidone. The treating physician (investigator) made a clinical judgement to decide if the fatal outcome, as a result of an ADR was related to pirfenidone.
